# Supplementary material
Source: PubMed Central journal article supplement (PMC10352923)
Supplement: jamainternmed-e232909-s001.pdf [file jamainternmed-e232909-s001.pdf]

## Data Sharing Statement

Strong. Chatbot vs Medical Student Performance on Free-Response Clinical Reasoning Examinations. *JAMA Intern Med.* Published July 17, 2023.

doi:10.1001/jamainternmed.2023.2909

### Data

**Data available:** Yes

**Data types:** Deidentified participant data, Data (not involving human participants)

**How to access data:** Requests can be sent to [estrong@stanford.edu](mailto:estrong@stanford.edu)

**When available:** With publication

### Supporting Documents

**Document types:** None

### Additional Information

**Who can access the data:** Anyone requesting the data

**Types of analyses:** For any purpose

**Mechanisms of data availability:** With investigator support

**Any additional restrictions:** We are unable to provide the actual clinical cases used in the study at the present time.
